# Supplementary material for: SGID: a comprehensive and interactive database of the silkworm
Source: PubMed Central journal article supplement (PMC6911161; doi:10.1093/database/baz134), 2019-12-14
Supplement: supplementary_figures_baz134.pdf [file supplementary_figures_baz134.pdf]

A.

| Gene                                                                                                                                                                                                                                                                                      | Short Name | Full Name                                                               |
|-------------------------------------------------------------------------------------------------------------------------------------------------------------------------------------------------------------------------------------------------------------------------------------------|------------|-------------------------------------------------------------------------|
| KWMTBOMO00115 (BGIBMGA002131)                                                                                                                                                                                                                                                             | dTRPA1     | Transient receptor potential cation channel subfamily A member 1 + More |
| Annotation: <a href="#">transient_receptor_potential_cation_channel_subfamily_A_member_1_[Bombyx_mori]</a>                                                                                                                                                                                |            |                                                                         |
| Description: Essential for thermotaxis by sensing environmental temperature. Receptor-activated non-selective cation channel involved in detection of sensations such as temperature. Involved in heat nociception by being activated by warm temperature of about 24-29 degrees Celsius. |            |                                                                         |
| <a href="#">Gene Information</a> <a href="#">Genome Browser</a> <a href="#">Gene Ontology and Pathway</a> <a href="#">Transcriptional Analysis</a> <a href="#">View Epigenomics Data</a> <a href="#">Protein Structure</a> <a href="#">Population genetics</a> <a href="#">Close</a>      |            |                                                                         |
| KWMTBOMO00118 (BGIBMGA002131)                                                                                                                                                                                                                                                             | dTRPA1     | Transient receptor potential cation channel subfamily A member 1 + More |
| Annotation: <a href="#">transient_receptor_potential_cation_channel_subfamily_A_member_1_[Bombyx_mori]</a>                                                                                                                                                                                |            |                                                                         |
| Description: Essential for thermotaxis by sensing environmental temperature. Receptor-activated non-selective cation channel involved in detection of sensations such as temperature. Involved in heat nociception by being activated by warm temperature of about 24-29 degrees Celsius. |            |                                                                         |

B.

|                      |                                                                                    |
|----------------------|------------------------------------------------------------------------------------|
| Gene                 | <b>KWMTBOMO08141</b> Validated by peptides from experiments 0                      |
| Pre Gene Modal       | BGIBMGA001085                                                                      |
| Annotation           | PREDICTED:_transient_receptor_potential-gamma_protein_[Bombyx_mori]                |
| Location             | <a href="#">Bomo_Chr13(-):17500270-17517839</a> <a href="#">View in EpiBrowser</a> |
| Full name            | Transient receptor potential-gamma protein                                         |
| Alternative Name     | Transient receptor potential cation channel gamma                                  |
| Location in the cell | PlasmaMembrane Reliability : 3.028                                                 |

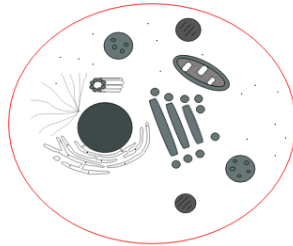

C.

### Summary

|                    |                                                                                                                                                                                                                                                          |
|--------------------|----------------------------------------------------------------------------------------------------------------------------------------------------------------------------------------------------------------------------------------------------------|
| Description        | <b>A light-sensitive calcium channel that is required for inositide-mediated Ca(2+) entry in the retina during phospholipase C (PLC)-mediated phototransduction (By similarity). Forms a regulated cation channel when heteromultimerized with trpl.</b> |
| Subunit            | Interacts preferentially with trpl and interacts to a lower extent with trp.                                                                                                                                                                             |
| Similarity         | Belongs to the transient receptor (TC 1.A.4) family.<br>Belongs to the transient receptor (TC 1.A.4) family. STpC subfamily.                                                                                                                             |
| Keywords           | <b>ANK repeat Calcium Calcium channel Calcium transport Complete proteome Ion channel Ion transport Membrane Reference proteome Repeat Sensory transduction Transmembrane Transmembrane helix Transport Vision</b>                                       |
| Feature            | chain Transient receptor potential-gamma protein                                                                                                                                                                                                         |
| Uniprot            | <a href="#">H9IV05</a> <a href="#">A0A212EVK1</a> <a href="#">A0A2H1WAA9</a> <a href="#">A0A2A4J9Y4</a> <a href="#">A0A2W1B XK2</a> <a href="#">A0A182RRP8</a> + More                                                                                    |
| Pubmed             | <a href="#">19121390</a> <a href="#">22118469</a> <a href="#">28756777</a> <a href="#">12364791</a> <a href="#">20966253</a> <a href="#">26227816</a> + More                                                                                             |
| EMBL               | <a href="#">BABH01000036</a> <a href="#">BABH01000037</a> <a href="#">BABH01000038</a> <a href="#">AGBW02012175</a> <a href="#">OWR45522.1</a> <a href="#">ODYU01007315</a> + More                                                                       |
| Proteomes          | <a href="#">UP000005204</a> <a href="#">UP000007151</a> <a href="#">UP000218220</a> <a href="#">UP000075900</a> <a href="#">UP000075920</a> <a href="#">UP000075902</a> + More                                                                           |
| PRIDE              | <a href="#">H9IV05</a> <a href="#">B7YZW4</a> <a href="#">Q9VJJ7</a>                                                                                                                                                                                     |
| Pfam               | <a href="#">PF08344</a> TRP_2 + More                                                                                                                                                                                                                     |
| Interpro           | <a href="#">IPR020683</a> Ankyrin_rpt-contain_dom + More                                                                                                                                                                                                 |
| SUPFAM             | <a href="#">SSF48403</a> SSF48403 + More                                                                                                                                                                                                                 |
| Gene 3D            | <a href="#">1.25.40.20</a> <a href="#">1.20.1560.10</a>                                                                                                                                                                                                  |
| CDD                | <a href="#">cd00204</a> ANK                                                                                                                                                                                                                              |
| ProteinModelPortal | <a href="#">H9IV05</a> <a href="#">A0A212EVK1</a> <a href="#">A0A2H1WAA9</a> <a href="#">A0A2A4J9Y4</a> <a href="#">A0A2W1B XK2</a> <a href="#">A0A182RRP8</a> + More                                                                                    |
| PDB                | <a href="#">5Z96</a> E-value=0, Score=1787                                                                                                                                                                                                               |

### Ontologies

|         |                                                                                                                                                |
|---------|------------------------------------------------------------------------------------------------------------------------------------------------|
| KEGG    | <a href="#">101736324</a> <a href="#">K04967</a> transient receptor potential cation channel subfamily C member 4   (RefSeq) transient recepto |
| PATHWAY | <a href="#">04745</a> Phototransduction - fly - Bombyx mori (domestic silkworm)                                                                |

D.

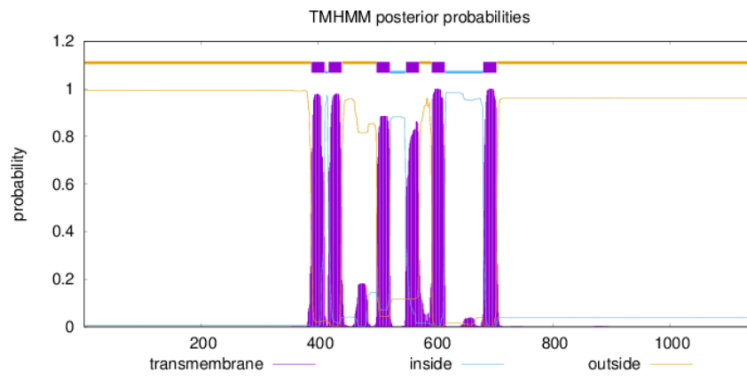

E.

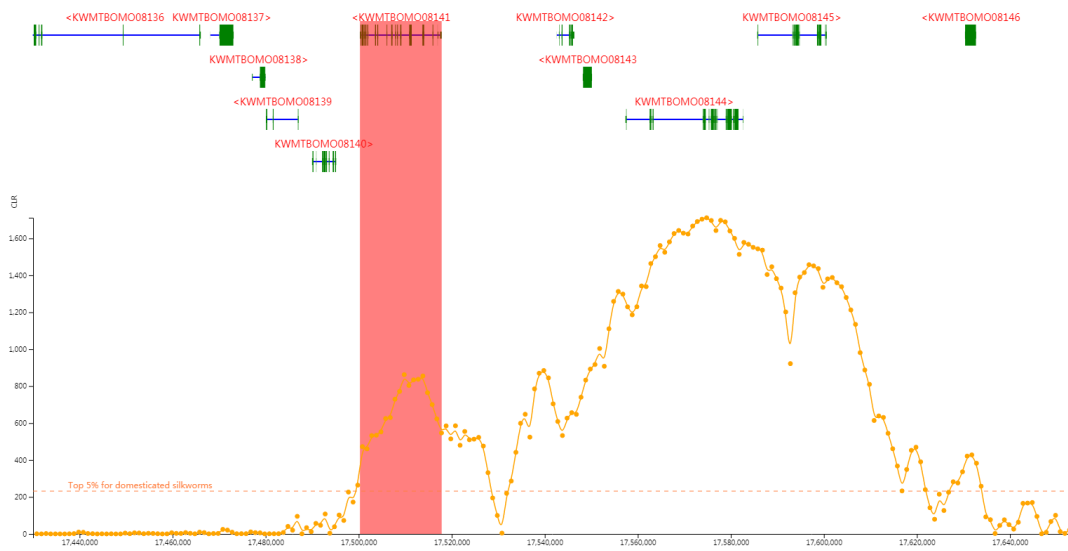

F.

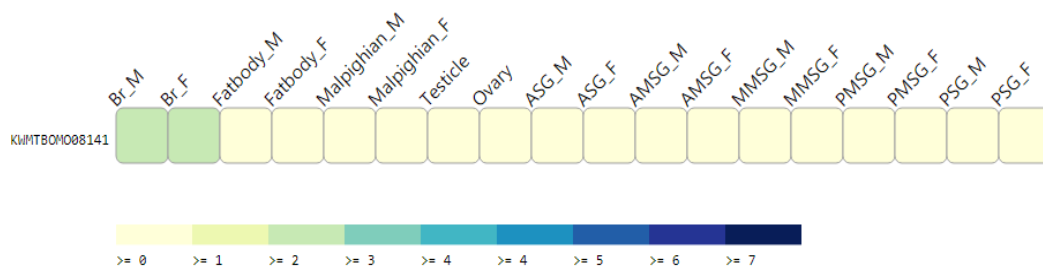

G.

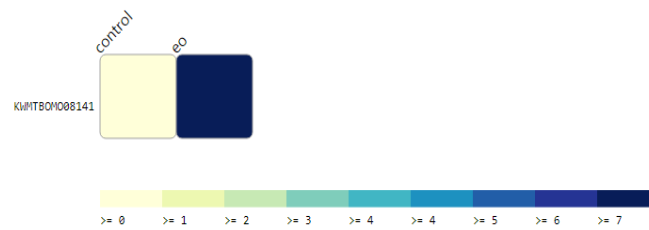

H.

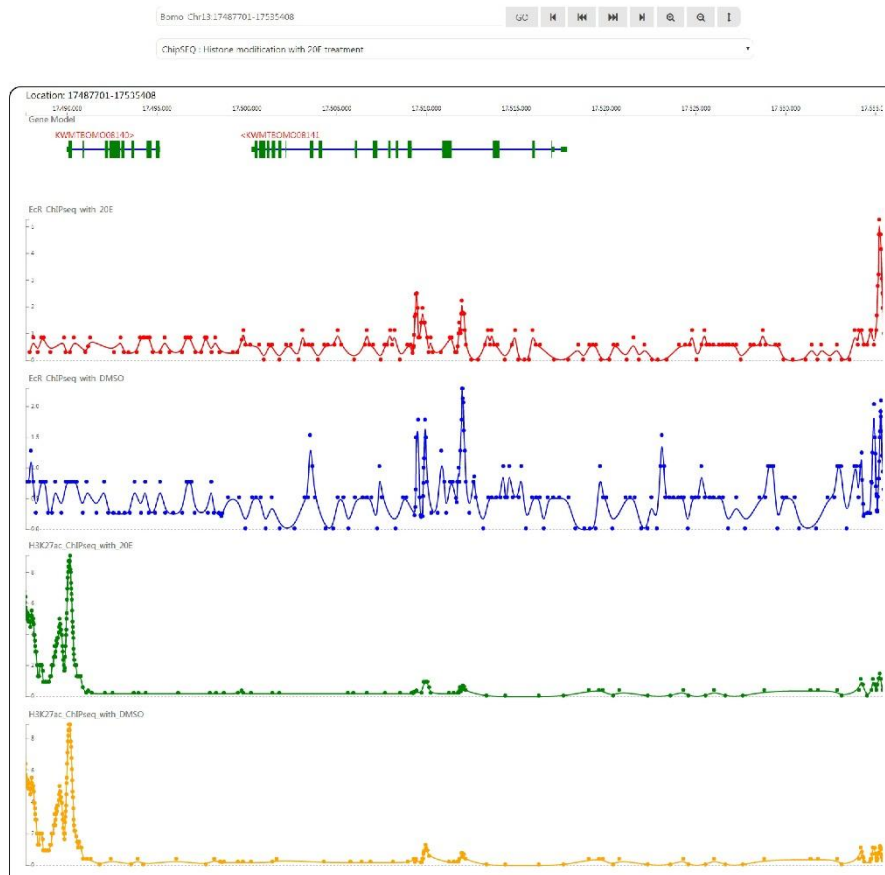

Figure S1. An example showing the online analysis of KWMTBOMO08141 in SGID. A is a snapshot of the search result for “transient receptor”. The result page lists correlated gene followed by links to gene details, genome browser, gene ontology and pathway, transcriptional analysis, epigenomic signal visualization, protein structure and population genetics analysis results. B is a snapshot of the gene detail page. Subcellular location of the gene is colored in red in a diagram following the basic information. C is the “summary” and “Ontology” parts in the detail page. D is a snapshot of the topology prediction in SGID. E is a CLR analysis figure generated by SGID genome browser with KWMTBOMO08141 marked by a focus bar colored in red. F is the expression of the gene in different tissues (PRJNA284192). M, male. F, female. Br, brain. ASG, anterior silk gland. AMSG, anterior middle silk gland. MMSG, middle middle silk gland. PMSG, post middle silk gland. PSG, post silk gland. G is the expression of the gene in the middle silk gland (PSG) of normal (control) and ecdysone oxidase overexpressed (eo) samples (PRJNA272381). H. A snapshot (partly displayed) of epigenomic signals at KWMTBOMO08141 in 4 cell lines (Ecr, H3K27ac, H3K4me1 and H3K4me3) treated with DMSO or 20E (PRJNA450142).
